# Supplementary material for: Feature Ranking in Predictive Models for Hospital-Acquired Acute Kidney Injury
Source: PubMed Central journal article supplement (PMC6251919; doi:10.1038/s41598-018-35487-0), 2018-11-23
Supplement: 41598_2018_35487_MOESM1_ESM.pdf [file 41598_2018_35487_MOESM1_ESM.pdf]

# Feature Ranking in Predictive Models for Hospital-Acquired Acute Kidney Injury

Lijuan Wu<sup>1,2†</sup>, Yong Hu<sup>1,2†\*</sup>, Xiaoxiao Liu<sup>1,2†</sup>, Xiangzhou Zhang<sup>1,2</sup>, Weiqi Chen<sup>1,2</sup>, Alan S.L. Yu<sup>3</sup>, John A. Kellum<sup>4</sup>, Lemuel R. Waitman<sup>5</sup>, Mei Liu<sup>5\*</sup>

<sup>1</sup>Big Data Decision Institute (BDDI), Jinan University, Guangzhou, 510632, China.

<sup>2</sup>Guangdong Engineering Technology Research Center for Big Data Precision Healthcare, Guangzhou, 510632, China.

<sup>3</sup>Division of Nephrology and Hypertension and the Kidney Institute, University of Kansas Medical Center, Kansas City, 66160, USA.

<sup>4</sup>Center for Critical Care Nephrology, Department of Critical Care Medicine, University of Pittsburgh School of Medicine, Pittsburgh, 15260, USA.

<sup>5</sup>Department of Internal Medicine, Division of Medical Informatics, University of Kansas Medical Center, Kansas City, 66160 USA.

## Supplementary Information

**Table S1.** The KDIGO staging system for AKI

**Table S2.** Discretization for patients' status

**Table S3.** Feature selection approaches in the experiments

**Table S4.** Frequency of top 10 features selected by 8 feature ranking methods

**Table S5.** Top 50 features selected by 8 feature ranking methods for AKI stages 1-3

**Table S6.** Summary of the predictors with literature support.

**Table S1.** The KDIGO staging system for AKI

| AKI Stage | Serum Creatinine (SCr) Criteria                                                                      |
|-----------|------------------------------------------------------------------------------------------------------|
| 1         | Increase $>26.4 \mu\text{mol/L}$ (0.3 mg/dL) within 48 hours or 1.5-1.9 times baseline within 7 days |
| 2         | Increase 2.0-2.9 times baseline                                                                      |
| 3         | Increase creatinine $>354 \mu\text{mol/L}$ (4.0 mg/dL) or 3 times baseline                           |

**Table S2.** Discretization for patients' status

| Patients' status    | Categories                                                           |
|---------------------|----------------------------------------------------------------------|
| <b>BMI</b>          | $<18.5$ , [18.5-24.9], [25.0–29.9], $>30.0$ , Unknown                |
| <b>Diastolic BP</b> | $<80$ , [80–89], [90–99], $>100$ , Unknown                           |
| <b>Systolic BP</b>  | $<120$ , [120–139], [140–159], $>160$ , Unknown                      |
| <b>Pulse</b>        | $<50$ , [50–65], [66–80], [81–100], $>100$ , Unknown                 |
| <b>Temperature</b>  | $<95.0$ , [95.0–97.6], [97.7–99.5], [99.5–104.0], $>104.0$ , Unknown |

**Table S3.** Feature selection approaches in the experiments

| Feature Selection | Uni/multivariate | Type     | Class        | Computing Complexity       |
|-------------------|------------------|----------|--------------|----------------------------|
| Chi2              | Univariate       | Filter   | Supervised   | $nm$                       |
| ILFS              | Multivariate     | Filter   | Supervised   | $O(m^{2.37} + im + n + C)$ |
| ReliefF           | Multivariate     | Filter   | Supervised   | $O(inmC)$                  |
| LS                | Multivariate     | Filter   | Unsupervised | N/A                        |
| LLCFS             | Multivariate     | Filter   | Unsupervised | N/A                        |
| mRMR              | Multivariate     | Filter   | Supervised   | $O(m^3n^2)$                |
| RF                | Multivariate     | Embedded | Supervised   | $O(inm \log n)$            |
| GBM               | Multivariate     | Embedded | Supervised   | N/A                        |

As for the complexity,  $n$  is the number of samples,  $m$  is the number of features,  $i$  is the number of iterations, and  $C$  is the number of classes. 'N/A' means that it is not documented in the literature. Note that LS can be performed in either supervised or unsupervised fashion, but in this article, we applied the unsupervised class.

**Table S4.** Frequency of top 10 features selected by 8 feature ranking methods

| ID        | Name                     | AKI-1<br>(N=6,396)<br>n (%) | AKI-2<br>(N=678)<br>n (%) | AKI-3<br>(N=185)<br>n (%) | non-AKI<br>(N=69,698)<br>n (%) |
|-----------|--------------------------|-----------------------------|---------------------------|---------------------------|--------------------------------|
| Age       | Age                      |                             |                           |                           |                                |
|           | 18-25                    | 303(4.74)                   | 29(4.28)                  | 25(13.51)                 | 4596(6.59)                     |
|           | 26-35                    | 514(8.04)                   | 44(6.49)                  | 23(12.43)                 | 7339(10.53)                    |
|           | 36-45                    | 711(11.12)                  | 76(11.21)                 | 25(13.51)                 | 8601(12.34)                    |
|           | 46-55                    | 1218(19.04)                 | 157(23.17)                | 35(18.92)                 | 14374(20.62)                   |
|           | 56-64                    | 1672(26.14)                 | 185(27.29)                | 49(26.49)                 | 16192(23.24)                   |
|           | >64                      | 1978(30.92)                 | 187(27.56)                | 28(15.14)                 | 18596(26.68)                   |
| BMI       | BMI (kg/m <sup>2</sup> ) |                             |                           |                           |                                |
|           | Unknown                  | 236(3.69)                   | 12(1.77)                  | 6(3.24)                   | 4844(6.95)                     |
|           | <18.5                    | 229(3.58)                   | 16(2.36)                  | 5(2.70)                   | 2258(3.24)                     |
|           | 18.5-24.9                | 1538(24.05)                 | 124(18.29)                | 36(19.46)                 | 18379(26.37)                   |
|           | 25.0-29.9                | 1738(27.17)                 | 188(27.73)                | 36(19.46)                 | 18875(27.08)                   |
|           | >30.0                    | 2655(41.51)                 | 338(49.85)                | 102(55.14)                | 25342(36.36)                   |
| Diastolic | Diastolic BP (mmHg)      |                             |                           |                           |                                |
|           | Unknown                  | 9(0.14)                     | 0(0)                      | 0(0)                      | 70(0.10)                       |
|           | <80                      | 4811(75.22)                 | 496(73.16)                | 120(64.86)                | 49768(71.41)                   |
|           | 80-89                    | 1108(17.32)                 | 113(16.67)                | 32(17.30)                 | 13808(19.81)                   |
|           | 90-99                    | 383(5.99)                   | 57(8.41)                  | 28(15.14)                 | 5035(7.22)                     |
|           | >100                     | 85(1.33)                    | 12(1.77)                  | 5(2.70)                   | 1017(1.46)                     |
| Systolic  | Systolic BP              |                             |                           |                           |                                |
|           | Unknown                  | 9(0.14)                     | 0(0)                      | 0(0)                      | 70(0.10)                       |
|           | <120                     | 2543(39.76)                 | 229(33.78)                | 44(23.78)                 | 26817(38.48)                   |
|           | 120-139                  | 2412(37.71)                 | 272(40.12)                | 73(39.46)                 | 28106(40.32)                   |
|           | 140-159                  | 1208(18.89)                 | 142(20.94)                | 56(30.27)                 | 12671(18.18)                   |
|           | >160                     | 224(3.50)                   | 35(5.16)                  | 12(6.49)                  | 2034(2.92)                     |
| Pulse     | Pulse (beats/min)        |                             |                           |                           |                                |
|           | Unknown                  | 9(0.14)                     | 0(0.00)                   | 0(0.00)                   | 69(0.10)                       |
|           | <50                      | 856(13.38)                  | 66(9.73)                  | 20(10.81)                 | 11206(16.08)                   |
|           | 50-65                    | 2201(34.41)                 | 236(34.81)                | 65(35.14)                 | 25905(37.17)                   |
|           | 66-80                    | 2451(38.32)                 | 276(40.71)                | 69(37.30)                 | 25471(36.54)                   |
|           | 81-100                   | 66(1.03)                    | 10(1.47)                  | 4(2.16)                   | 346(0.50)                      |
|           | >100                     | 813(12.71)                  | 90(13.27)                 | 27(14.59)                 | 6701(9.61)                     |
| Temp      | Temperature (°F)         |                             |                           |                           |                                |
|           | Unknown                  | 13(0.20)                    | 0(0.00)                   | 0(0.00)                   | 115(0.16)                      |
|           | <95.0                    | 30(0.47)                    | 4(0.59)                   | 2(1.08)                   | 67(0.10)                       |
|           | 95.0-97.6                | 4949(77.38)                 | 525(77.43)                | 138(74.59)                | 56240(80.69)                   |
|           | 97.7-99.5                | 195(3.05)                   | 46(6.78)                  | 11(5.95)                  | 1216(1.74)                     |
|           | 99.5-104.0               | 1(0.02)                     | 0(0.00)                   | 1(0.54)                   | 7(0.01)                        |

|        |                                 |             |            |            |              |
|--------|---------------------------------|-------------|------------|------------|--------------|
|        | >104.0                          | 1208(18.89) | 103(15.19) | 33(17.84)  | 12053(17.29) |
| Lab0   | Albumin (g/dL)                  |             |            |            |              |
|        | Unknown                         | 647(10.12)  | 71(10.47)  | 19(10.27)  | 11652(16.72) |
|        | <3.5                            | 3634(56.82) | 405(59.73) | 104(56.22) | 31367(45.39) |
|        | 3.5-5.5                         | 2115(33.06) | 202(29.79) | 62(33.51)  | 26398(37.87) |
|        | >5.5                            | 0(0.00)     | 0(0.00)    | 0(0.00)    | 13(0.02)     |
| Lab2   | AST (U/L)                       |             |            |            |              |
|        | Unknown                         | 645(10.08)  | 73(10.77)  | 20(10.81)  | 11642(16.70) |
|        | <10                             | 91(1.42)    | 10(1.47)   | 2(1.08)    | 1005(1.44)   |
|        | 10-40                           | 4271(66.78) | 418(61.65) | 126(68.11) | 46839(67.21) |
|        | >40                             | 1389(21.72) | 177(26.11) | 37(20.00)  | 10205(14.64) |
| Lab4   | Calcium (mg/dL)                 |             |            |            |              |
|        | Unknown                         | 2(0.03)     | 1(0.15)    | 0(0)       | 17(0.02)     |
|        | <8.5                            | 2615(40.88) | 303(44.69) | 65(35.14)  | 22721(32.60) |
|        | 8.5-10.2                        | 3705(57.93) | 373(55.01) | 119(64.32) | 46537(66.77) |
|        | >10.2                           | 74(1.16)    | 1(0.15)    | 1(0.54)    | 419(0.60)    |
| Lab5   | BUN (mmol/L)                    |             |            |            |              |
|        | Unknown                         | 1(0.02)     | 1(0.15)    | 0(0)       | 16(0.02)     |
|        | <7                              | 635(9.93)   | 81(11.95)  | 40(21.62)  | 11278(16.18) |
|        | 7-20                            | 4590(71.76) | 486(71.68) | 135(72.97) | 51837(74.38) |
|        | >20                             | 1170(18.29) | 110(16.22) | 10(5.41)   | 6563(9.42)   |
| Lab6   | Bilirubin (mg/dL)               |             |            |            |              |
|        | Unknown                         | 652(10.19)  | 73(10.77)  | 20(10.81)  | 11711(16.80) |
|        | <0.3                            | 226(3.53)   | 18(2.65)   | 6(3.24)    | 2920(4.19)   |
|        | 0.3-1.9                         | 4909(76.75) | 503(74.19) | 144(77.84) | 52115(74.77) |
|        | >1.9                            | 609(9.52)   | 84(12.39)  | 15(8.11)   | 2952(4.24)   |
| Lab9   | Glucose (mg/dL)                 |             |            |            |              |
|        | Unknown                         | 2(0.03)     | 1(0.15)    | 0(0)       | 16(0.02)     |
|        | <80                             | 302(4.72)   | 16(2.36)   | 4(2.16)    | 3504(5.03)   |
|        | 80-160                          | 4997(78.13) | 514(75.81) | 151(81.62) | 59206(84.95) |
|        | >160                            | 1095(17.12) | 147(21.68) | 30(16.22)  | 6972(10.00)  |
| Lab11  | Platelets ( $\times 10^9/L$ )   |             |            |            |              |
|        | Unknown                         | 18(0.28)    | 1(0.15)    | 1(0.54)    | 139(0.20)    |
|        | <150                            | 1776(27.77) | 181(26.70) | 41(22.16)  | 14834(21.28) |
|        | 150-450                         | 4324(67.60) | 460(67.85) | 132(71.35) | 52207(74.90) |
|        | >450                            | 278(4.35)   | 36(5.31)   | 11(5.95)   | 2518(3.61)   |
| Lab13  | WBC ( $\times 10^9/L$ )         |             |            |            |              |
|        | Unknown                         | 18(0.28)    | 1(0.15)    | 1(0.54)    | 136(0.20)    |
|        | <3.5                            | 450(7.04)   | 41(6.05)   | 7(3.78)    | 3773(5.41)   |
|        | 3.5-10.5                        | 3676(57.47) | 339(50.00) | 103(55.68) | 49373(70.84) |
|        | >10.5                           | 2252(35.21) | 297(43.81) | 74(40.00)  | 16416(23.55) |
| DRG0   | Liver transplant                | 126(1.97)   | 24(3.54)   | 7(3.78)    | 147(0.21)    |
| DRG3   | Tracheotomy w/dmv w exten proc  | 99(1.55)    | 10(1.47)   | 3(1.62)    | 80(0.11)     |
| DRG97  | Maj small & large bowel proc    | 147(2.30)   | 19(2.80)   | 2(1.08)    | 423(0.61)    |
| DRG178 | Kidney/urinary trach malignancy | 59(0.92)    | 1(0.15)    | 0(0.00)    | 264(0.38)    |

|         |                                            |             |            |            |              |
|---------|--------------------------------------------|-------------|------------|------------|--------------|
| DRG179  | Kidney/urinary trach nonmalignancy         | 92(1.44)    | 5(0.74)    | 0(0.00)    | 416(0.60)    |
| DRG261  | Infect & parasitic disease                 | 110(1.72)   | 31(4.57)   | 6(3.24)    | 322(0.46)    |
| DRG263  | Septicemia & dissem infect                 | 359(5.61)   | 46(6.78)   | 20(10.81)  | 2420(3.47)   |
| COM2    | Renal failure                              | 354(5.53)   | 43(6.34)   | 6(3.24)    | 1377(1.98)   |
| COM12   | Obesity                                    | 1044(16.32) | 75(11.06)  | 20(10.81)  | 4379(6.28)   |
| COM24   | Hypertension                               | 3373(52.74) | 392(57.82) | 95(51.35)  | 31934(45.82) |
| MED12   | Oxycodone                                  | 3690(57.69) | 411(60.62) | 117(63.24) | 42493(60.97) |
| MED134  | Benzoic acid                               | 2754(43.06) | 265(39.09) | 56(30.27)  | 17751(25.47) |
| MED139  | 1,2,6-hexanetriol                          | 4202(65.70) | 439(64.75) | 125(67.57) | 39166(56.19) |
| MED308  | (all-z)-4,7,10,13,16-docosapentaenoic acid | 3098(48.44) | 324(47.79) | 90(48.65)  | 28898(41.46) |
| MED314  | Lactate                                    | 2259(35.32) | 297(43.81) | 93(50.27)  | 28307(40.61) |
| MED319  | Amphotericin b liposome                    | 82(1.28)    | 7(1.03)    | 1(0.54)    | 104(0.15)    |
| MED321  | Vancomycin                                 | 2005(31.35) | 301(44.40) | 97(52.43)  | 14266(20.47) |
| MED516  | Glucose                                    | 4119(64.40) | 510(75.22) | 144(77.84) | 34019(48.81) |
| MED548  | Insulin regular, human buffered            | 1173(18.34) | 131(19.32) | 21(11.35)  | 6389(9.17)   |
| MED582  | Levofloxacin                               | 2098(32.80) | 236(34.81) | 67(36.22)  | 16760(24.05) |
| MED655  | Calcium chloride                           | 2505(39.17) | 327(48.23) | 98(52.97)  | 29602(42.47) |
| MED677  | Polyethylene glycol 3350                   | 2042(31.93) | 183(26.99) | 49(26.49)  | 23349(33.50) |
| MED746  | Insulin, aspart, human/rdna                | 2621(40.98) | 287(42.33) | 59(31.89)  | 20192(28.97) |
| MED880  | Heparin, porcine                           | 2817(44.04) | 290(42.77) | 71(38.38)  | 23563(33.81) |
| MED939  | Amiodarone                                 | 744(11.63)  | 74(10.91)  | 10(5.41)   | 3512(5.04)   |
| MED1039 | Aldesleukin                                | 142(2.22)   | 12(1.77)   | 0(0.00)    | 107(0.15)    |
| MED1086 | Tazobactam                                 | 1899(29.69) | 285(42.04) | 92(49.73)  | 11385(16.33) |
| MED1100 | Magnesium sulfate                          | 3082(48.19) | 336(49.56) | 61(32.97)  | 26682(38.28) |
| CCS58   | Cystic fibrosis                            | 211(3.30)   | 8(1.18)    | 4(2.16)    | 979(1.40)    |
| CCS71   | Skin and subcutaneous tissue infections    | 482(7.54)   | 60(8.85)   | 25(13.51)  | 4219(6.05)   |
| CCS219  | Cancer of liver and intrahepatic bile duct | 107(1.67)   | 21(3.10)   | 7(3.78)    | 641(0.92)    |

**Table S5.** Top 50 features selected by 8 feature ranking methods for AKI stages 1-3

| AKI     | Chi2      | ILFS         | ReliefF | LS           | LLCFS        | mRMR        | RF           | GBM         |
|---------|-----------|--------------|---------|--------------|--------------|-------------|--------------|-------------|
| Stage 1 | MED134    | MED746       | MED1086 | Age          | Pulse        | MED134      | Age          | WBC         |
| Top-2   | MED1086   | MED1100      | WBC     | Temperature  | Systolic BP  | MED1086     | Pulse        | MED1086     |
| Top-3   | MED516    | MED582       | MED321  | Pulse        | BMI          | WBC         | WBC          | MED1039     |
| Top-4   | BUN       | MED880       | Glucose | WBC          | WBC          | Glucose     | BMI          | MED134      |
| Top-5   | WBC       | MED308       | MED12   | BMI          | BUN          | MED548      | Systolic BP  | CCS58       |
| Top-6   | MED548    | Calcium      | MED880  | Systolic BP  | Age          | MED1039     | MED1086      | BUN         |
| Top-7   | MED746    | Glucose      | MED134  | AST          | Glucose      | BUN         | MED134       | COM24       |
| Top-8   | MED939    | MED134       | Calcium | BUN          | AST          | DRG0        | BUN          | DRG179      |
| Top-9   | MED321    | WBC          | Age     | Glucose      | Bilirubin    | DRG3        | Calcium      | DRG97       |
| Top-10  | MED880    | MED139       | MED677  | Diastolic BP | Temperature  | COM2        | MED516       | MED319      |
| Top-11  | MED149    | COM14        | MED139  | ALT          | Diastolic BP | MED516      | Diastolic BP | Pulse       |
| Top-12  | Glucose   | Albumin      | MED1009 | MED655       | Platelets    | Bilirubin   | Glucose      | MED321      |
| Top-13  | MED310    | AST          | MED464  | MED314       | Calcium      | CCS230      | MED321       | Calcium     |
| Top-14  | Bilirubin | COM16        | MED1078 | COM24        | MED308       | MED464      | Platelets    | BMI         |
| Top-15  | CCS118    | COM27        | MED548  | MED1078      | MED12        | MED319      | COM24        | Bilirubin   |
| Top-16  | MED1152   | MED236       | DRG259  | MED746       | MED1133      | DRG261      | MED1133      | DRG3        |
| Top-17  | AST       | MED762       | BMI     | CCS199       | ALT          | MED880      | Gender       | DRG178      |
| Top-18  | MED582    | MED321       | MED41   | MED134       | MED1078      | COM10       | MED880       | Glucose     |
| Top-19  | COM10     | MED41        | MED746  | MED41        | MED1100      | COM0        | Albumin      | COM2        |
| Top-20  | COM2      | Glucose      | MED689  | MED1100      | MED880       | DRG68       | MED12        | Age         |
| Top-21  | MED139    | MED1086      | Albumin | MED66        | MED677       | Temperature | MED746       | DRG2        |
| Top-22  | MED1039   | COM24        | COM7    | MED437       | Gender       | Calcium     | MED677       | MED566      |
| Top-23  | Calcium   | CCS55        | COM0    | Bilirubin    | MED134       | COM13       | MED464       | MED464      |
| Top-24  | MED1100   | MED1212      | MED888  | MED566       | MED746       | MED1212     | MED139       | MED516      |
| Top-25  | MED464    | ALT          | MED582  | MED308       | CCS161       | MED746      | Temperature  | CCS230      |
| Top-26  | MED873    | MED12        | MED155  | MED139       | MED41        | MED96       | MED236       | MED1111     |
| Top-27  | CCS230    | MED1191      | MED249  | MED516       | COM24        | DRG69       | Bilirubin    | MED853      |
| Top-28  | CCS247    | Pulse        | MED334  | MED147       | MED516       | AST         | MED308       | AST         |
| Top-29  | COM28     | CCS52        | CCS161  | MED880       | MED582       | MED321      | MED548       | MED880      |
| Top-30  | DRG0      | MED853       | MED717  | MED12        | MED1191      | MED572      | AST          | DRG0        |
| Top-31  | MED1000   | MED1111      | MED1133 | Platelets    | MED437       | DRG49       | MED1100      | DRG90       |
| Top-32  | MED853    | MED630       | AST     | CCS61        | MED66        | MED939      | MED1078      | MED334      |
| Top-33  | MED79     | CCS247       | Glucose | MED464       | MED655       | COM11       | MED334       | COM16       |
| Top-34  | DRG3      | CCS199       | Gender  | MED608       | MED1086      | DRG90       | MED41        | MED12       |
| Top-35  | MED566    | MED464       | MED66   | MED1133      | COM14        | COM22       | MED1191      | DRG261      |
| Top-36  | MED155    | MED836       | BUN     | CCS161       | MED314       | Pulse       | MED1111      | COM23       |
| Top-37  | MED249    | MED1048      | MED1100 | MED836       | MED321       | MED937      | CCS161       | MED1212     |
| Top-38  | MED147    | MED787       | MED55   | MED582       | CCS199       | MED853      | MED582       | COM13       |
| Top-39  | DRG68     | MED821       | MED174  | Calcium      | Albumin      | COM27       | MED1212      | DRG128      |
| Top-40  | COM11     | MED187       | Pulse   | MED1152      | MED1075      | COM16       | MED437       | MED79       |
| Top-41  | DRG69     | Diastolic BP | MED939  | CCS247       | MED762       | DRG66       | Race1        | DRG69       |
| Top-42  | Platelets | MED334       | MED1191 | MED1191      | MED236       | MED659      | CCS199       | MED41       |
| Top-43  | Age       | DRG131       | MED594  | CCS127       | MED334       | DRG140      | COM14        | Temperature |

|                |             |           |             |              |              |             |              |              |
|----------------|-------------|-----------|-------------|--------------|--------------|-------------|--------------|--------------|
| Top-44         | MED1231     | MED1009   | MED187      | COM28        | MED464       | COM23       | MED1075      | MED677       |
| Top-45         | MED836      | CCS124    | MED1111     | MED98        | MED138       | COM12       | COM0         | DRG68        |
| Top-46         | COM13       | DRG259    | MED308      | Albumin      | MED608       | DRG128      | COM16        | DRG84        |
| Top-47         | MED762      | CCS230    | CCS52       | MED787       | Race1        | CCS209      | MED853       | CCS118       |
| Top-48         | Pulse       | Bilirubin | MED853      | MED321       | MED594       | DRG284      | MED66        | MED187       |
| Top-49         | COM14       | MED436    | Bilirubin   | MED677       | CCS55        | MED1008     | MED138       | COM10        |
| Top-50         | CCS15       | MED943    | MED268      | MED334       | CCS52        | CCS118      | MED1230      | MED548       |
| <b>Stage 2</b> | MED1086     | MED1100   | MED1086     | Age          | Age          | MED1086     | MED1086      | WBC          |
| Top-2          | MED321      | Calcium   | Glucose     | Temperature  | BMI          | WBC         | Age          | MED1086      |
| Top-3          | MED516      | MED582    | MED321      | Pulse        | Pulse        | DRG0        | WBC          | DRG261       |
| Top-4          | WBC         | WBC       | WBC         | BMI          | Systolic BP  | COM12       | MED321       | DRG0         |
| Top-5          | DRG261      | MED746    | MED655      | WBC          | WBC          | DRG261      | Systolic BP  | MED1039      |
| Top-6          | DRG0        | MED321    | MED880      | Systolic BP  | AST          | MED516      | Pulse        | MED677       |
| Top-7          | Glucose     | MED134    | MED12       | AST          | Glucose      | Glucose     | BMI          | MED321       |
| Top-8          | Bilirubin   | Glucose   | AST         | Diastolic BP | BUN          | Temperature | MED516       | COM2         |
| Top-9          | Temperature | MED1086   | MED134      | MED655       | MED655       | Bilirubin   | Glucose      | Calcium      |
| Top-10         | MED548      | Albumin   | COM12       | MED314       | Platelets    | COM2        | Diastolic BP | DRG3         |
| Top-11         | MED149      | MED689    | BMI         | Glucose      | Gender       | DRG3        | BUN          | BMI          |
| Top-12         | MED1152     | MED880    | MED334      | COM24        | Temperature  | COM22       | Temperature  | Pulse        |
| Top-13         | AST         | COM24     | Albumin     | ALT          | MED1133      | MED321      | Calcium      | Diastolic BP |
| Top-14         | COM12       | Glucose   | Calcium     | BUN          | MED677       | MED548      | DRG261       | Glucose      |
| Top-15         | DRG3        | COM14     | MED677      | MED566       | Albumin      | MED96       | AST          | MED516       |
| Top-16         | MED1008     | BMI       | COM24       | CCS199       | MED308       | Calcium     | COM12        | MED864       |
| Top-17         | MED134      | AST       | MED1078     | MED1078      | MED1100      | COM10       | Gender       | Temperature  |
| Top-18         | MED746      | MED1009   | MED582      | MED41        | Calcium      | MED1008     | Bilirubin    | Age          |
| Top-19         | MED281      | COM16     | MED134      | MED147       | ALT          | MED864      | Platelets    | MED746       |
| Top-20         | MED310      | MED762    | Glucose     | MED746       | MED147       | MED281      | MED1133      | MED566       |
| Top-21         | COM3        | Pulse     | COM12       | MED437       | CCS161       | COM16       | COM24        | AST          |
| Top-22         | COM2        | MED655    | MED41       | MED1100      | MED746       | COM24       | MED677       | COM21        |
| Top-23         | MED939      | CCS199    | MED1230     | MED139       | CCS199       | AST         | MED12        | COM12        |
| Top-24         | MED96       | Race3     | MED1075     | MED516       | MED134       | MED1039     | COM16        | COM16        |
| Top-25         | COM10       | MED1111   | MED821      | MED464       | MED1075      | DRG66       | DRG0         | MED319       |
| Top-26         | BMI         | MED1191   | Race4       | MED308       | MED762       | Pulse       | MED1191      | MED501       |
| Top-27         | COM22       | MED1152   | Bilirubin   | MED134       | MED66        | DRG262      | MED1100      | MED1008      |
| Top-28         | DRG66       | DRG259    | MED1152     | MED12        | MED314       | MED1152     | COM14        | COM24        |
| Top-29         | Calcium     | MED1078   | MED746      | MED66        | MED608       | DRG115      | MED139       | CCS55        |
| Top-30         | MED864      | CCS225    | MED464      | MED880       | MED41        | COM3        | MED746       | MED1133      |
| Top-31         | MED1039     | MED677    | Systolic BP | CCS61        | Diastolic BP | MED319      | MED236       | MED314       |
| Top-32         | Pulse       | MED138    | COM3        | Platelets    | MED566       | COM21       | Albumin      | MED362       |
| Top-33         | COM16       | MED314    | COM7        | MED1133      | COM24        | MED133      | Race1        | DRG49        |
| Top-34         | MED582      | MED334    | CCS61       | CCS161       | MED836       | MED497      | MED1078      | MED464       |
| Top-35         | COM24       | MED890    | MED1111     | MED98        | MED321       | DRG309      | MED334       | DRG262       |
| Top-36         | BUN         | CCS58     | MED139      | MED1191      | Bilirubin    | MED572      | MED308       | DRG309       |
| Top-37         | CCS182      | MED1123   | MED866      | Bilirubin    | MED236       | DRG49       | MED464       | DRG97        |
| Top-38         | MED133      | DRG263    | MED6        | MED608       | MED880       | MED1076     | CCS199       | COM14        |

|                |              |             |              |              |              |             |              |              |
|----------------|--------------|-------------|--------------|--------------|--------------|-------------|--------------|--------------|
| Top-39         | MED762       | DRG297      | BUN          | MED582       | MED787       | COM14       | MED41        | MED281       |
| Top-40         | COM14        | COM27       | CCS127       | Albumin      | MED582       | MED501      | MED134       | MED417       |
| Top-41         | MED79        | CCS62       | COM16        | Gender       | MED803       | MED362      | MED880       | COM22        |
| Top-42         | DRG262       | MED974      | MED236       | Calcium      | MED516       | DRG30       | MED582       | Bilirubin    |
| Top-43         | COM11        | MED139      | Race1        | CCS247       | MED12        | CCS219      | MED314       | Race2        |
| Top-44         | MED1100      | MED698      | CCS225       | MED677       | MED1078      | CCS182      | MED1212      | DRG66        |
| Top-45         | CCS219       | MED1044     | COM0         | MED888       | MED1152      | COM23       | MED1111      | MED1152      |
| Top-46         | CCS225       | CCS168      | MED594       | MED174       | MED1111      | DRG7        | MED1152      | MED833       |
| Top-47         | MED873       | MED464      | MED203       | COM28        | CCS79        | BUN         | CCS161       | Race1        |
| Top-48         | MED880       | MED630      | CCS199       | MED836       | MED98        | DRG119      | MED281       | MED497       |
| Top-49         | COM21        | CCS125      | COM14        | Race1        | CCS175       | MED417      | MED655       | COM23        |
| Top-50         | MED319       | CCS53       | CCS182       | CCS127       | MED464       | DRG116      | MED1075      | MED635       |
| <b>Stage 3</b> | MED1086      | MED321      | DRG178       | Age          | Age          | MED1086     | Age          | Age          |
| Top-2          | MED321       | Glucose     | DRG3         | Temperature  | WBC          | DRG0        | Systolic BP  | MED1086      |
| Top-3          | DRG0         | MED1086     | DRG97        | Pulse        | Pulse        | Systolic BP | MED1086      | MED321       |
| Top-4          | Temperature  | WBC         | MED1086      | BMI          | BMI          | Temperature | Pulse        | MED516       |
| Top-5          | MED516       | BMI         | COM24        | Systolic BP  | Systolic BP  | WBC         | Diastolic BP | Temperature  |
| Top-6          | DRG3         | MED139      | CCS71        | WBC          | AST          | MED314      | BMI          | DRG261       |
| Top-7          | Systolic BP  | MED308      | MED314       | AST          | BUN          | DRG3        | MED321       | DRG0         |
| Top-8          | DRG261       | Systolic BP | BMI          | Diastolic BP | Diastolic BP | COM12       | Temperature  | WBC          |
| Top-9          | WBC          | MED582      | DRG0         | MED655       | Platelets    | MED321      | WBC          | CCS219       |
| Top-10         | DRG263       | MED880      | COM12        | MED314       | Temperature  | DRG261      | MED314       | MED314       |
| Top-11         | BMI          | COM24       | MED321       | COM24        | MED1100      | DRG49       | MED41        | MED102       |
| Top-12         | Age          | MED314      | MED516       | ALT          | Gender       | MED497      | MED12        | DRG4         |
| Top-13         | Diastolic BP | MED1191     | Systolic BP  | Glucose      | MED1133      | MED686      | Albumin      | Diastolic BP |
| Top-14         | COM12        | MED236      | BMI          | BUN          | MED655       | CCS219      | BUN          | Systolic BP  |
| Top-15         | CCS71        | MED655      | Diastolic BP | MED566       | Glucose      | MED140      | MED1100      | DRG262       |
| Top-16         | DRG262       | MED1241     | MED12        | CCS199       | MED677       | CCS175      | Calcium      | MED746       |
| Top-17         | Pulse        | MED677      | MED582       | MED1078      | MED12        | DRG4        | Platelets    | DRG30        |
| Top-18         | DRG49        | CCS225      | MED1100      | MED147       | Albumin      | DRG119      | Race1        | DRG49        |
| Top-19         | MED140       | CCS23       | MED1191      | MED41        | MED308       | CCS135      | COM24        | DRG219       |
| Top-20         | CCS219       | MED937      | COM16        | MED437       | ALT          | MED516      | MED1078      | MED408       |
| Top-21         | DRG4         | MED1159     | WBC          | MED746       | MED516       | DRG115      | MED1191      | DRG2         |
| Top-22         | MED582       | MED1078     | MED655       | MED464       | Calcium      | COM17       | MED308       | AST          |
| Top-23         | CCS260       | CCS77       | COM24        | MED1100      | MED880       | DRG262      | Gender       | DRG263       |
| Top-24         | Glucose      | CCS116      | MED139       | MED139       | MED314       | Glucose     | MED334       | BMI          |
| Top-25         | CCS182       | CCS219      | MED310       | MED516       | MED236       | DRG186      | MED677       | MED1027      |
| Top-26         | MED532       | COM7        | Glucose      | MED12        | MED1075      | MED1060     | MED516       | Bilirubin    |
| Top-27         | MED876       | CCS133      | MED630       | MED308       | CCS161       | MED128      | COM16        | Glucose      |
| Top-28         | MED497       | MED1244     | MED41        | MED66        | MED147       | DRG153      | MED880       | MED677       |
| Top-29         | MED664       | CCS109      | AST          | MED134       | COM24        | CCS71       | Race2        | MED516       |
| Top-30         | MED139       | COM13       | MED880       | CCS61        | MED41        | COM1        | MED1212      | MED352       |
| Top-31         | MED175       | CCS16       | MED953       | MED880       | CCS199       | CCS30       | MED139       | MED41        |
| Top-32         | MED1152      | MED334      | CCS165       | Platelets    | MED66        | DRG263      | Glucose      | MED686       |
| Top-33         | MED155       | CCS67       | COM12        | MED1133      | MED566       | MED1142     | MED437       | MED1133      |

|        |           |              |           |           |           |         |           |         |
|--------|-----------|--------------|-----------|-----------|-----------|---------|-----------|---------|
| Top-34 | MED249    | Platelets    | CCS225    | MED98     | MED582    | MED1119 | COM12     | MED6    |
| Top-35 | MED310    | CCS223       | BUN       | CCS161    | MED464    | MED256  | MED236    | MED140  |
| Top-36 | MED686    | MED664       | Albumin   | MED1191   | MED134    | Pulse   | DRG263    | MED1212 |
| Top-37 | COM11     | CCS22        | Bilirubin | Gender    | MED746    | CCS260  | MED134    | MED1017 |
| Top-38 | MED256    | COM1         | MED1048   | Albumin   | MED1212   | DRG25   | MED582    | DRG3    |
| Top-39 | COM17     | Race3        | CCS232    | Calcium   | MED1078   | MED584  | COM14     | MED600  |
| Top-40 | Bilirubin | COM12        | MED1009   | MED608    | MED762    | MED692  | MED464    | MED334  |
| Top-41 | MED655    | Diastolic BP | MED260    | MED582    | Bilirubin | DRG179  | MED746    | MED464  |
| Top-42 | DRG2      | CCS211       | MED348    | MED888    | MED321    | MED876  | CCS161    | COM2    |
| Top-43 | BUN       | MED1040      | MED1172   | MED677    | MED608    | DRG116  | COM27     | DRG68   |
| Top-44 | MED73     | CCS130       | COM28     | CCS247    | MED139    | DRG113  | COM0      | MED73   |
| Top-45 | CCS175    | MED866       | COM3      | MED174    | Race1     | MED589  | MED888    | MED138  |
| Top-46 | MED314    | MED813       | MED436    | Race1     | MED1111   | MED102  | MED655    | MED510  |
| Top-47 | MED244    | MED689       | CCS265    | MED236    | MED98     | COM11   | MED314    | MED873  |
| Top-48 | MED1119   | COM17        | CCS116    | COM28     | MED787    | DRG111  | MED510    | MED572  |
| Top-49 | ALT       | CCS146       | CCS247    | Bilirubin | MED437    | MED154  | Bilirubin | MED1100 |
| Top-50 | Race2     | MED66        | MED689    | MED836    | COM14     | DRG13   | CCS199    | DRG140  |

**Abbreviation:** Race1: White; Race2: African American; Race3: Asian; Race4: Other Race; COM0: Diabetes w/CCs; COM1: Hypothyroidism; COM2: Renal failure; COM3: Liver disease; COM7: Metastatic cancer; COM10: Congestive Heart Failure; COM11: Coagulopathy; COM12: Obesity; COM13: Weight loss; COM14: Fluid and electr disorders; COM16: Deficiency Anemias; COM17: Alcohol abuse; COM21: Valvular disease; COM22: Pulmonary circulation disease; COM23: Peripheral vascular disease; COM24: Hypertension; COM27: Chronic pulmonary disease; COM28: Diabetes w/o CCs; DRG0: Liver transplant; DRG2: Bone marrow transplant; DRG3: Trach w/dmv w exten proc; DRG4: Trach w/dmv w/o enten proc; DRG7: Craniotomy exc for trauma; DRG13: Nervous system neoplasms; DRG25: Seizure; DRG30: Oth disorders nervous sys; DRG49: Respiratory system diag; DRG66: Cardiac valve proc w/cath; DRG68: Coronary bypass w/card cath; DRG69: Cor bypass w/o card cath; DRG84: Heart failure; DRG90: Card arrhythmia & conduction; DRG97: Maj small & large bowel proc; DRG111: Inflammatory bowel disease; DRG113: Intestinal obstruction; DRG115: Non-bacterial gi; DRG116: Abdominal pain; DRG119: Oth digestive system diag; DRG128: Pancreas disord exc malig; DRG131: Hip joint replacement; DRG140: Knee & lower leg proc; DRG153: Back & neck disorders; DRG178: Kidney/urinary tract malig; DRG179: Kidney/urin tract-nonmalig; DRG186: Kidney/urin tract infect; DRG219: Other antepartum diagnoses; DRG259: Chemotherapy; DRG261: Infect & parasitic disease; DRG262: Post-op/trauma infect proc; DRG263: Septicemia & dissem infect; DRG284: Alcohol abuse & dependence; DRG297: Rehabilitation; DRG309: Extensive proc unrel pdx; MED6: desflurane; MED12: oxycodone; MED41: bisacodyl; MED55: 4-((4,6-bis(octylthio)-1,3,5-triazin-2-yl)amino)-2,6-bis(1,1-dimethylethyl)-phenol; MED66: aluminium hydroxide; MED73: voriconazole; MED79: prochlorperazine; MED96: bicyclo; MED98: sevoflurane; MED128: clopidogrel bisulfate; MED133: nitroprusside; MED134: benzoic acid; MED138: methylene blue; MED139: 1,2,6-hexanetriol; MED140: hypochlorite; MED147: 3-((1-menthyl)oxy)propane-1,2-diol; MED149: albumin human; MED154: idarubicin; MED155: gly; MED174: potassium chloride; MED175: propiolactone; MED187: trisulfapyrimidines; MED203: metformin; MED236: hydrocodone; MED244: mannitol; MED249: argipressin; MED256: fludarabine; MED260: atorvastatin; MED268: fluticasone; MED281: mercaptopurine; MED308: (all-z)-4,7,10,13,16-docosapentaenoic acid; MED310: aminocaproic acid; MED314: lactate; MED319: amphotericin b liposome; MED321: vancomycin; MED334: paracetamol; MED348: nystatin; MED352: caspofungin; MED362: acetylcysteine (obsolete); MED408: calcium gluconate; MED417: methotrexate; MED436: calcium (as carbonate); MED437: 1-(4-(4-chlorophenyl)-3-phenyl-2-butenyl)-pyrrolidine 1,5-naphthalenedisulfonate; MED464: dexamethasone; MED497: cisatracurium; MED501: colistin; MED510: esomeprazole; MED516: glucose; MED532: formaldehyde; MED548: insulin regular,human buffered; MED566: glycopyrronium bromide; MED572: diazepam; MED582: levofloxacin; MED584: naproxen; MED589: bumetanide; MED594: prednisone; MED600: insulin detemir; MED608: simethicone; MED630: lidocaine (obsolete); MED635: olive leaf; MED655: calcium chloride; MED659: ursodeoxycholate; MED664: influenza b virus; MED677: polyethylene glycol 3350; MED686: pentaerithryl tetranitrate; MED689: famotidine; MED692: pancuronium; MED698: soybean oil; MED717: methylprednisolone; MED746: insulin,aspart,human/rdna; MED762: sodium bicarb (obsolete); MED787:

acetylsalicylic acid; MED803: ethyl chloride; MED813: ether; MED821: sulfonamide; MED833: vecuronium; MED836: glyceryl trinitrate; MED853: carvedilol; MED864: hydroxyethyl starch 130-0.4; MED866: vinylbital; MED873: spironolactone; MED876: micafungin; MED880: heparin,porcine; MED888: bacitracin; MED890: dibasic sod ph (obsolete); MED937: ropivacaine; MED939: amiodarone; MED943: insulin, isophane; MED953: codeine; MED974: sodium phosphate,monobasic; MED1000: alteplase; MED1008: vasopressin; MED1009: diphenhydramine; MED1017: valine; MED102: amphotericin b; MED1027: deslanoside; MED1039: aldesleukin; MED1040: sodium gluconate; MED1044: phospholipids,egg; MED1048: ferrous sulfate; MED1060: indole; MED1075: imidazole; MED1076: coagulation factor viia; MED1078: magnesium hydroxide; MED1086: tazobactam; MED1100: magnesium sulfate; MED1111: aminobutyrate; MED1119: basiliximab; MED1123: cyclobenzaprine; MED1133: benzimidazole; MED1142: acetazolamide; MED1152: albumin; MED1159: potassium; MED1172: bupivacaine; MED1191: docusate; MED1212: suprofen; MED1230: acetaminophen; MED1231: atropine; MED1241: zinc sulfate; MED1244: valproate; CCS15: Respiratory failure; insufficiency; arrest (adult); CCS16: Pleurisy; pneumothorax; pulmonary collapse; CCS22: Esophageal disorders; CCS23: Conditions associated with dizziness or vertigo; CCS30: Melanomas of skin; CCS52: Deficiency and other anemia; CCS53: Other nutritional; endocrine; and metabolic disorders; CCS55: Fluid and electrolyte disorders; CCS58: Cystic fibrosis; CCS61: Disorders of lipid metabolism; CCS62: Nutritional deficiencies; CCS67: Chronic ulcer of skin; CCS71: Skin and subcutaneous tissue infections; CCS77: Aortic; peripheral; and visceral artery aneurysms; CCS79: Other circulatory disease; CCS109: E Codes: Motor vehicle traffic (MVT); CCS116: Syncope; CCS118: Congestive heart failure; nonhypertensive; CCS124: Nonspecific chest pain; CCS125: Pulmonary heart disease; CCS127: Coronary atherosclerosis and other heart disease; CCS130: Other and ill-defined heart disease; CCS133: Leukemias; CCS135: Cancer of kidney and renal pelvis; CCS146: E Codes: Adverse effects of medical drugs; CCS161: Residual codes; unclassified; CCS165: Allergic reactions; CCS168: Medical examination/evaluation; CCS175: Cardiac dysrhythmias; CCS182: Septicemia (except in labor); CCS199: Essential hypertension; CCS209: Other diseases of kidney and ureters; CCS211: Heart valve disorders; CCS219: Cancer of liver and intrahepatic bile duct; CCS223: Blindness and vision defects; CCS225: Other liver diseases; CCS230: Acute and unspecified renal failure; CCS232: Urinary tract infections; CCS247: Diabetes mellitus without complication; CCS260: Infective arthritis and osteomyelitis (except that caused by tuberculosis or sexually transmitted disease); CCS265: Other non-traumatic joint disorders.

**Table S6.** Summary of the predictors with literature support.

| Categories                                       | Name                      | #       | Cite                                |
|--------------------------------------------------|---------------------------|---------|-------------------------------------|
| Demographics                                     | age                       | 31      | 1-31                                |
|                                                  | gender                    | 17      | 7,10-12,14-17,19,20,23,27,28,31-34  |
|                                                  | race                      | 1       | 16                                  |
| Patients' Status                                 | BMI                       | 7       | 4,14,16,23,26,30,35                 |
|                                                  | systolic BP               | 2       | 11,24                               |
|                                                  | diastolic BP              | 1       | 11                                  |
|                                                  | temperature               | 2       | 11,16                               |
| Lab Tests                                        | WBC                       | 4       | 11,16,27,31                         |
|                                                  | BUN                       | 3       | 8,11,16                             |
|                                                  | AST                       | 3       | 10,11,16                            |
|                                                  | ALT                       | 2       | 16,28                               |
|                                                  | glucose                   | 4       | 11,16,27,36                         |
|                                                  | albumin                   | 2       | 11,16                               |
|                                                  | calcium                   | 2       | 11,16                               |
|                                                  | platelets                 | 4       | 3,8,11,16                           |
|                                                  | total bilirubin           | 3       | 8,11,16                             |
|                                                  | Diseases                  | shock   | 3                                   |
| obesity                                          |                           | 2       | 20,21                               |
| weight loss                                      |                           | 1       | 35                                  |
| hypertension                                     |                           | 18      | 2-4,9,13,16,18-21,23,26,31,32,37-40 |
| renal failure                                    |                           | 7       | 2,7,19,21,28,37,41                  |
| liver disease                                    |                           | 3       | 16,30,37                            |
| alcohol abuse                                    |                           | 1       | 16                                  |
| CVA w infarct                                    |                           | 1       | 16                                  |
| congestive heart failure                         |                           | 8       | 14,16,20,31,33,37,41,42             |
| chronic pulmonary disease                        |                           | 3       | 13,18,26                            |
| septicemia/infection                             |                           | 2       | 37,43                               |
| septicemia (except in labor)                     |                           | 2       | 22,27                               |
| peripheral vascular disease                      |                           | 5       | 16,23,26,31,41                      |
| acute myocardial infarction                      |                           | 2       | 22,27                               |
| diabetes                                         |                           | 19      | 4,5,13,16-23,28,31,33,38,40,42,44   |
| anemias                                          |                           | 6       | 9,13,16,18,22,37                    |
| cancer                                           |                           | 2       | 16,21                               |
| chronic obstructive lung disease                 |                           | 5       | 14,16,30,33,45                      |
| coronary atherosclerosis and other heart disease |                           | 1       | 44                                  |
| Medications                                      |                           | lactate | 3                                   |
|                                                  | vancomycin                | 1       | 16                                  |
|                                                  | sodium bicarb (obsolete)  | 1       | 16                                  |
|                                                  | acetylcysteine (obsolete) | 1       | 16                                  |
|                                                  | antiFungals               | 1       | 16                                  |
|                                                  | beta blockers             | 1       | 16                                  |
|                                                  | vasopressor               | 2       | 5,38                                |
|                                                  | lipid-lowering treatment  | 1       | 26                                  |

|                 |   |          |
|-----------------|---|----------|
| NSAIDs          | 2 | 16,27    |
| diuretics       | 3 | 27,38,47 |
| antibiotic      | 1 | 27       |
| glucocorticoids | 1 | 16       |
| insulin         | 2 | 16,32    |

---

NOTE: three categories, including comorbidities (COM), admission diagnosis (DRG), and medical history (CCS), were merged into one category (i.e., diseases).

---

- 1 Araujo, G. N. *et al.* Simplifying contrast-induced acute kidney injury prediction after primary percutaneous coronary intervention: the age, creatinine and ejection fraction score. *Cardiovascular intervention and therapeutics* **33**, 224-231 (2018).
- 2 Zambetti, B. R. *et al.* A web-based tool to predict acute kidney injury in patients with ST-elevation myocardial infarction: Development, internal validation and comparison. *PloS one* **12**, e0181658 (2017).
- 3 Wang, L. *et al.* Electronic health record-based predictive models for acute kidney injury screening in pediatric inpatients. *Pediatric research* **82**, 465 (2017).
- 4 Smith, L. E., Smith, D. K., Blume, J. D., Siew, E. D. & Billings, F. T. Latent variable modeling improves AKI risk factor identification and AKI prediction compared to traditional methods. *BMC nephrology* **18**, 55 (2017).
- 5 Mao, Y. & Qin, Z.-H. Risk factors of acute kidney injury and dialysis among patients attending intensive care units in China. *Int J Clin Exp Med* **10**, 12056-12067 (2017).
- 6 Duan, C. *et al.* A new preprocedure risk score for predicting contrast-induced acute kidney injury. *Canadian Journal of Cardiology* **33**, 714-723 (2017).
- 7 Zhou, L. Z. *et al.* Development and validation of a risk score for prediction of acute kidney injury in patients with acute decompensated heart failure: A prospective cohort study in China. *Journal of the American Heart Association* **5**, e004035 (2016).
- 8 Sanchez-Pinto, L. N. & Khemani, R. G. Development of a prediction model of early acute kidney injury in critically ill children using electronic health record data. *Pediatric Critical Care Medicine* **17**, 508-515 (2016).
- 9 Nah, C. W. *et al.* A clinical score to predict acute kidney injury after cardiac surgery in a Southeast-Asian population. *Interactive cardiovascular and thoracic surgery* **23**, 757-761 (2016).
- 10 Liu, X. *et al.* A predictive model for assessing surgery-related acute kidney injury risk in hypertensive patients: a retrospective cohort study. *PloS one* **11**, e0165280 (2016).
- 11 Koyner, J. L., Adhikari, R., Edelson, D. P. & Churpek, M. M. Development of a multicenter ward-based AKI prediction model. *Clinical Journal of the American Society of Nephrology*, CJN. 00280116 (2016).
- 12 Jiang, W. *et al.* Dynamic predictive scores for cardiac surgery-associated acute kidney injury. *Journal of the American Heart Association* **5**, e003754 (2016).
- 13 Inohara, T. *et al.* Performance and validation of the US NCDR acute kidney injury prediction model in Japan. *Journal of the American College of Cardiology* **67**, 1715-1722 (2016).
- 14 Kristovic, D. *et al.* Cardiac surgery-associated acute kidney injury: risk factors analysis and comparison of prediction models. *Interactive cardiovascular and thoracic surgery* **21**, 366-373 (2015).
- 15 Gursoy, M., Hokenek, A. F., Duygu, E., Atay, M. & Yavuz, A. Clinical SYNTAX score can predict acute kidney injury following on-pump but not off-pump coronary artery bypass surgery. *Cardiorenal medicine* **5**, 297-305 (2015).
- 16 Cronin, R. M. *et al.* National Veterans Health Administration inpatient risk stratification models for hospital-acquired acute kidney injury. *Journal of the American Medical Informatics Association* **22**, 1054-1071 (2015).

- 17 Bell, S. *et al.* Risk of postoperative acute kidney injury in patients undergoing orthopaedic surgery—development and validation of a risk score and effect of acute kidney injury on survival: observational cohort study. *Bmj* **351**, h5639 (2015).
- 18 Tsai, T. T. *et al.* Validated contemporary risk model of acute kidney injury in patients undergoing percutaneous coronary interventions: insights from the National Cardiovascular Data Registry Cath - PCI Registry. *Journal of the American Heart Association* **3**, e001380 (2014).
- 19 Simonini, M. *et al.* A new clinical multivariable model that predicts postoperative acute kidney injury: impact of endogenous ouabain. *Nephrology Dialysis Transplantation* **29**, 1696-1701 (2014).
- 20 Ng, S. Y. *et al.* Prediction of acute kidney injury within 30 days of cardiac surgery. *The Journal of thoracic and cardiovascular surgery* **147**, 1875-1883. e1871 (2014).
- 21 Cruz, D. N. *et al.* Utilization of small changes in serum creatinine with clinical risk factors to assess the risk of AKI in critically ill adults. *Clinical Journal of the American Society of Nephrology* **9**, 663-672 (2014).
- 22 Chen, Y. L. *et al.* A simple preprocedural score for risk of contrast - induced acute kidney injury after percutaneous coronary intervention. *Catheterization and Cardiovascular Interventions* **83**, E8-E16 (2014).
- 23 Birnie, K. *et al.* Predictive models for kidney disease: improving global outcomes (KDIGO) defined acute kidney injury in UK cardiac surgery. *Critical Care* **18**, 606 (2014).
- 24 Wang, Y. n., Cheng, H., Yue, T. & Chen, Y. p. Derivation and validation of a prediction score for acute kidney injury in patients hospitalized with acute heart failure in a Chinese cohort. *Nephrology* **18**, 489-496 (2013).
- 25 Kim, W. H. *et al.* Simplified clinical risk score to predict acute kidney injury after aortic surgery. *Journal of cardiothoracic and vascular anesthesia* **27**, 1158-1166 (2013).
- 26 Berg, K. S., Stenseth, R., Wahba, A., Pleym, H. & Videm, V. How can we best predict acute kidney injury following cardiac surgery?: a prospective observational study. *European Journal of Anaesthesiology (EJA)* **30**, 704-712 (2013).
- 27 Matheny, M. E. *et al.* Development of inpatient risk stratification models of acute kidney injury for use in electronic health records. *Medical Decision Making* **30**, 639-650 (2010).
- 28 Slankamenac, K. *et al.* Development and validation of a prediction score for postoperative acute renal failure following liver resection. *Annals of surgery* **250**, 720-728 (2009).
- 29 Palomba, H., De Castro, I., Neto, A., Lage, S. & Yu, L. Acute kidney injury prediction following elective cardiac surgery: AKICS Score. *Kidney international* **72**, 624-631 (2007).
- 30 Kheterpal, S. *et al.* Predictors of postoperative acute renal failure after noncardiac surgery in patients with previously normal renal function. *Anesthesiology: The Journal of the American Society of Anesthesiologists* **107**, 892-902 (2007).
- 31 Brown, J. R. *et al.* Multivariable prediction of renal insufficiency developing after cardiac surgery. *Circulation* **116**, I-139-I-143 (2007).
- 32 Jain, A., McDonald, H. I., Nitsch, D., Tomlinson, L. & Thomas, S. L. Risk factors for developing acute kidney injury in older people with diabetes and community-acquired pneumonia: a population-based UK cohort study. *BMC nephrology* **18**, 142 (2017).
- 33 Crosina, J. *et al.* Improving the Prediction of Cardiac Surgery—Associated Acute Kidney Injury. *Kidney international reports* **2**, 172-179 (2017).
- 34 Ohnuma, T. *et al.* External validation for acute kidney injury severity scores: a multicenter retrospective study in 14 Japanese ICUs. *American journal of nephrology* **42**, 57-64 (2015).
- 35 Park, M. H. *et al.* Clinical risk scoring models for prediction of acute kidney injury after living donor liver transplantation: a retrospective observational study. *PLoS One* **10**, e0136230 (2015).
- 36 Park, H. S. *et al.* Contrast volume/raw eGFR ratio for predicting contrast-induced acute kidney injury in patients undergoing percutaneous coronary intervention for myocardial infarction. *Cardiorenal medicine* **5**, 61-68 (2015).

- 37 Malhotra, R. *et al.* A risk prediction score for acute kidney injury in the intensive care unit. *Nephrology Dialysis Transplantation* **32**, 814-822 (2017).
- 38 Kane-Gill, S. L. *et al.* Risk factors for acute kidney injury in older adults with critical illness: a retrospective cohort study. *American journal of kidney diseases* **65**, 860-869 (2015).
- 39 Rueggeberg, A. *et al.* Development of a risk stratification model for predicting acute renal failure in orthotopic liver transplantation recipients. *Anaesthesia* **63**, 1174-1180 (2008).
- 40 Inohara, T. *et al.* Development and validation of a pre-percutaneous coronary intervention risk model of contrast-induced acute kidney injury with an integer scoring system. *The American journal of cardiology* **115**, 1636-1642 (2015).
- 41 Hougardy, J.-M. *et al.* Chronic kidney disease as major determinant of the renal risk related to on-pump cardiac surgery: a single-center cohort study. *Acta Chirurgica Belgica* **116**, 217-224 (2016).
- 42 Pannu, N. *et al.* A new model to predict acute kidney injury requiring renal replacement therapy after cardiac surgery. *Canadian Medical Association Journal, cmaj*. 151447 (2016).
- 43 Zang, H. *et al.* Incidence, risk factors and outcomes of acute kidney injury (AKI) in patients with acute-on-chronic liver failure (ACLF) of underlying cirrhosis. *Hepatology international* **10**, 807-818 (2016).
- 44 Kate, R. J., Perez, R. M., Mazumdar, D., Pasupathy, K. S. & Nilakantan, V. Prediction and detection models for acute kidney injury in hospitalized older adults. *BMC medical informatics and decision making* **16**, 39 (2016).
- 45 Eriksen, B. O., Hoff, K. R. & Solberg, S. Prediction of acute renal failure after cardiac surgery: retrospective cross - validation of a clinical algorithm. *Nephrology Dialysis Transplantation* **18**, 77-81 (2003).
- 46 Jorge-Monjas, P. *et al.* Predicting cardiac surgery-associated acute kidney injury: The CRATE score. *Journal of critical care* **31**, 130-138 (2016).
- 47 Slankamenac, K., Beck-Schimmer, B., Breitenstein, S., Puhan, M. A. & Clavien, P.-A. Novel prediction score including pre-and intraoperative parameters best predicts acute kidney injury after liver surgery. *World journal of surgery* **37**, 2618-2628 (2013).
